# Supplementary material
Source: MDPI journal article supplement (https://www.mdpi.com/1424-8247/15/12/1568)
Supplement: s1 [file s1]

# ISOTOPIC RADIOLABELING OF CRIZOTINIB WITH FLUORINE-18 FOR IN VIVO PET IMAGING

**Malvika Sardana<sup>1,2</sup>, Louise Breuil<sup>2</sup>, Sébastien Goutal<sup>2</sup>, Maud Goislard<sup>2</sup>, Mikhail Kondrashov<sup>3</sup>, Etienne Marchal<sup>2</sup>, Florent L. Besson<sup>2</sup>, Christophe Dugave<sup>4</sup>, Gail Wrigley<sup>5</sup>, Anna C. Jonson<sup>1</sup>, Bertrand Kuhnast<sup>2</sup>, Magnus Schou<sup>3,6</sup>, Nicolas Tournier<sup>2</sup>, Charles S. Elmore<sup>1</sup> and Fabien Caillé<sup>2,\*</sup>**

<sup>1</sup>Early Chemical Development, Pharmaceutical Sciences, Bio Pharmaceuticals R&D, AstraZeneca, Gothenburg, Sweden

<sup>2</sup>Université Paris-Saclay, Inserm, CNRS, CEA, Laboratoire d'Imagerie Biomédicale Multimodale Paris-Saclay (BioMaps), 91401 Orsay

<sup>3</sup>Department of Clinical Neuroscience, Centre for Psychiatry Research, Karolinska Institutet and Stockholm County Council, SE-171 76 Stockholm, Stockholm, Sweden

<sup>4</sup>Université Paris-Saclay, Service de Chimie Bio-organique et Marquage (SCBM), CEA/DRF/JOLIOT, 91191, Gif-sur-Yvette, France

<sup>5</sup>Medicinal Chemistry, Oncology R&D, AstraZeneca, Cambridge, UK

<sup>6</sup>AZ PET Science Centre at Karolinska Institutet, Oncology R&D, AstraZeneca, Stockholm, Sweden

\*Corresponding author :

Fabien Caillé, PhD

CEA-Service Hospitalier Frédéric Joliot

4, place du Général Leclerc

91401 Orsay, France

fabien.caille@cea.fr

ORCID: 0000-0003-0088-7337

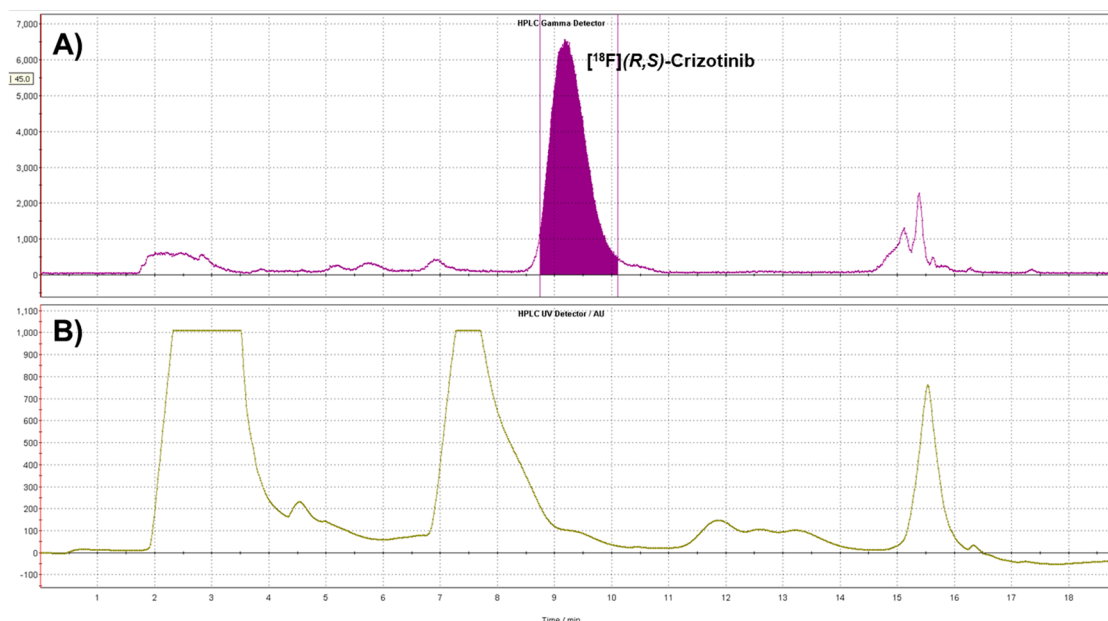

**Figure S1.** Semi-preparative HPLC purification of  $[^{18}\text{F}](R,S)$ -crizotinib, which is obtained at a retention time of approx. 9.2 min. A) Gamma detection; B) UV detection at 254 nm.

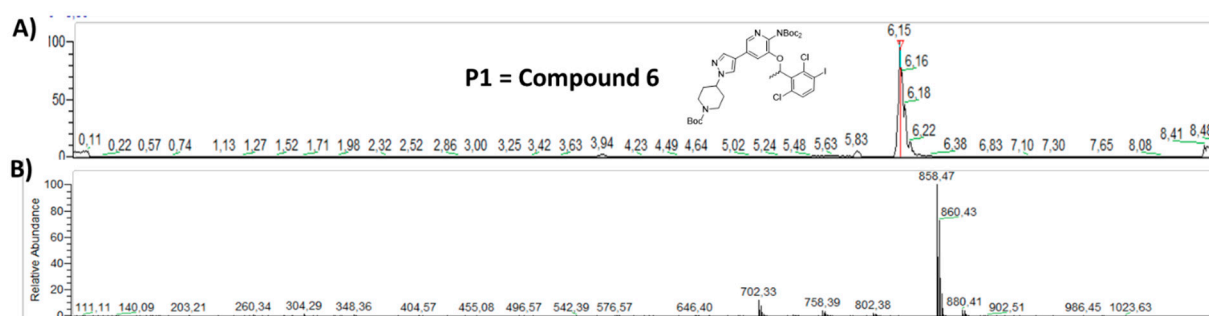

**Figure S2.** LC-MS<sup>+</sup> analysis of compound P1. A) LC analysis with MS<sup>+</sup> detection; B) Positive mass spectroscopy of the peak at  $t_R = 6.15$  min.

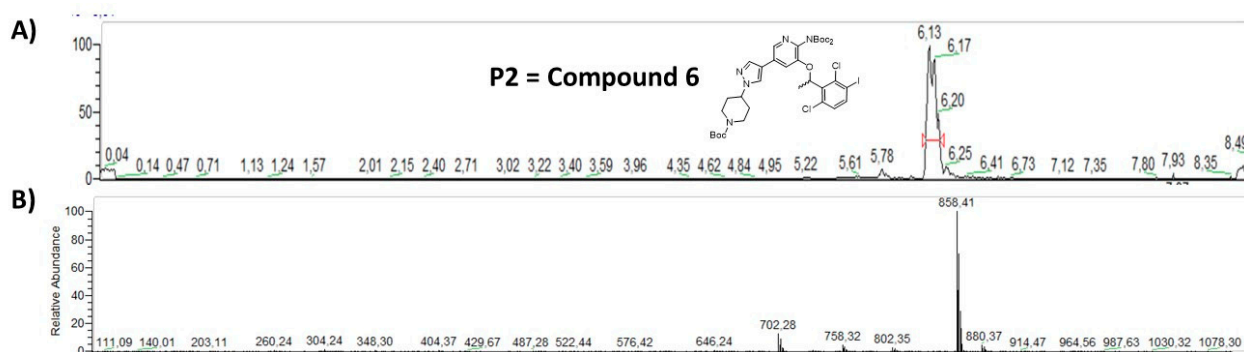

**Figure S3.** LC-MS<sup>+</sup> analysis of compound P2. A) LC analysis with MS<sup>+</sup> detection; B) Positive mass spectroscopy of the peak at  $t_R = 6.13$ -6.20 min.

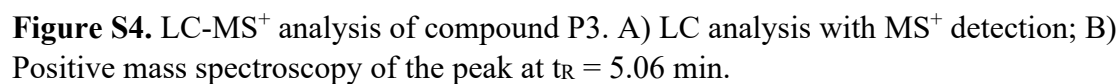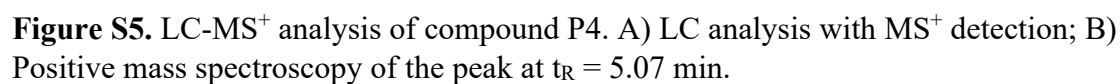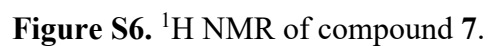

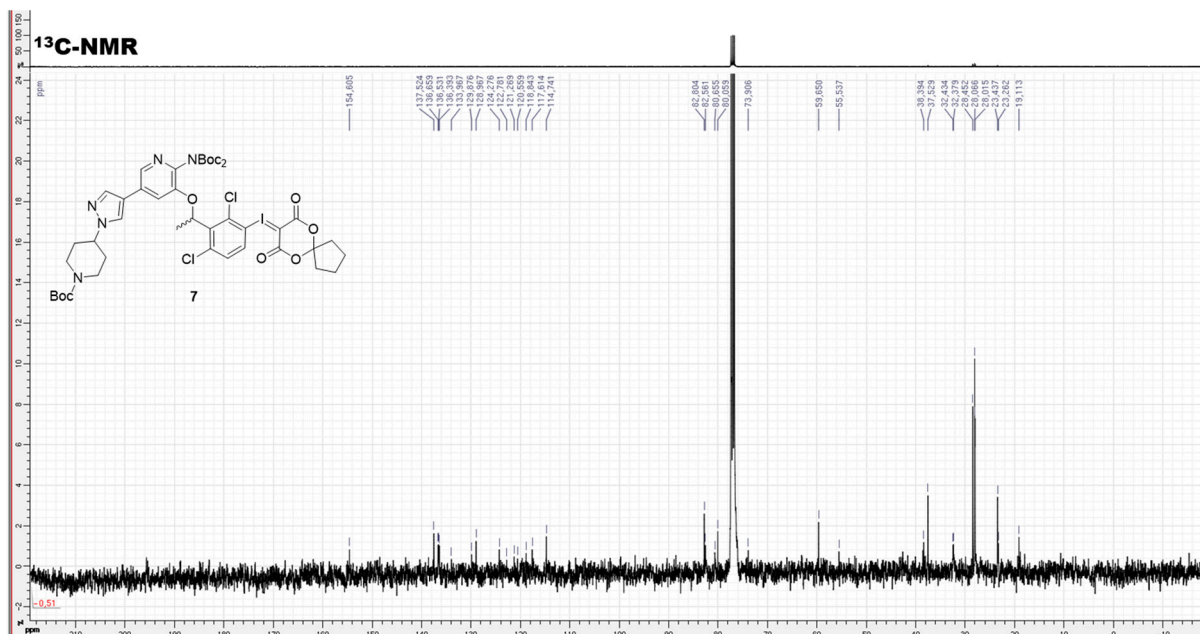

Figure S7. <sup>13</sup>C NMR of compound 7.

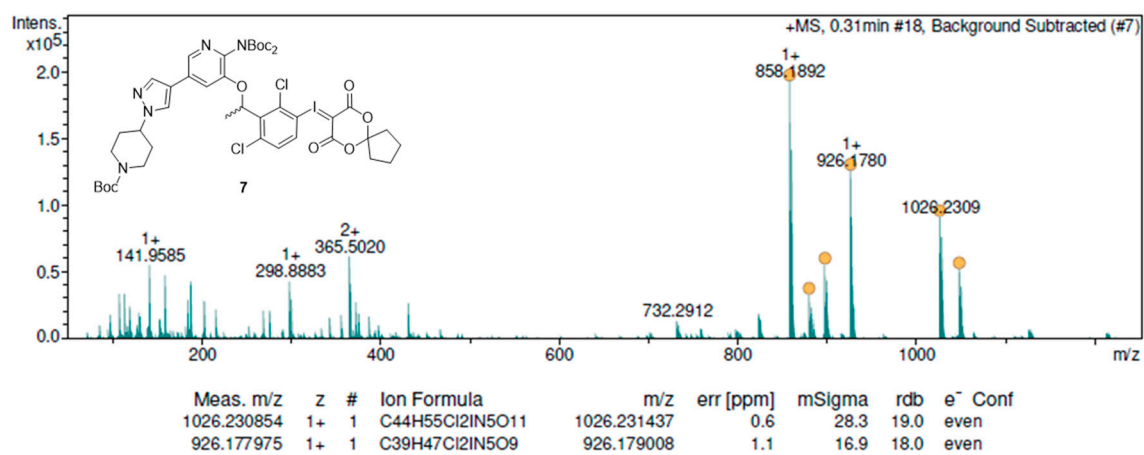

Figure S8. HRMS analysis of compound 7.

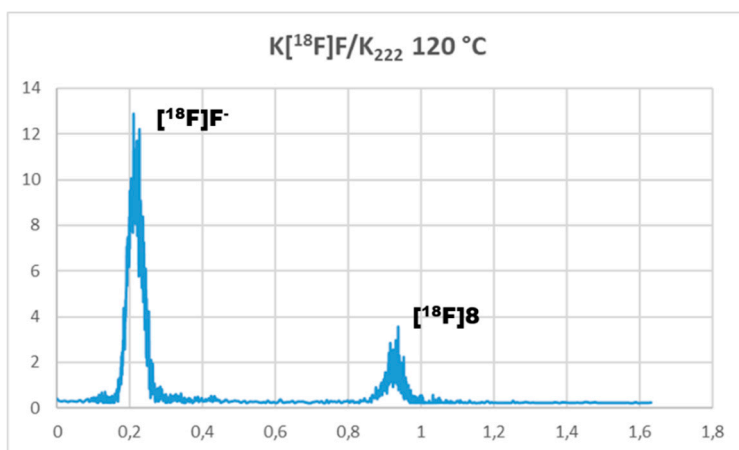

**Figure S9.** TLC of the crude radiofluorination of **7** using the  $\text{K}[^{18}\text{F}]\text{F}/\text{K}_{222}$  complex in DMF at 120 °C for 10 minutes.

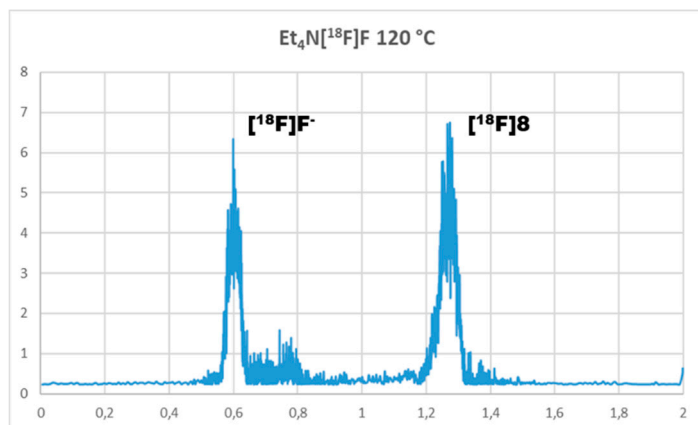

**Figure S10.** TLC of the crude radiofluorination of **7** using Et<sub>4</sub>N[<sup>18</sup>F]F in DMF at 160 °C for 10 minutes.

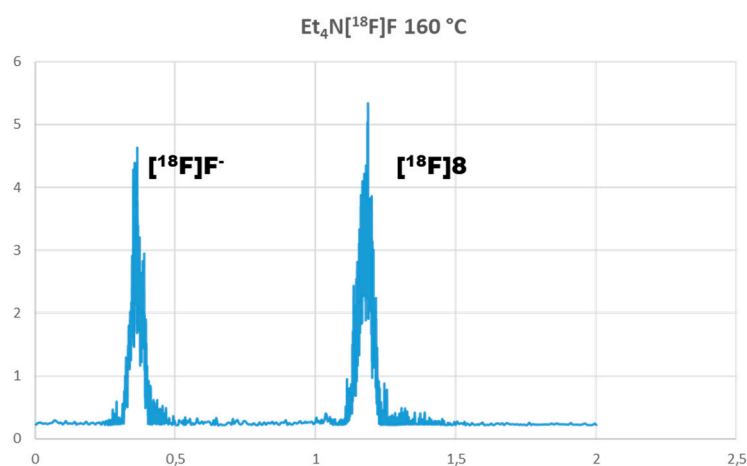

**Figure S11.** TLC of the crude radiofluorination of **7** using Et<sub>4</sub>N[<sup>18</sup>F]F in DMF at 160 °C for 10 minutes.

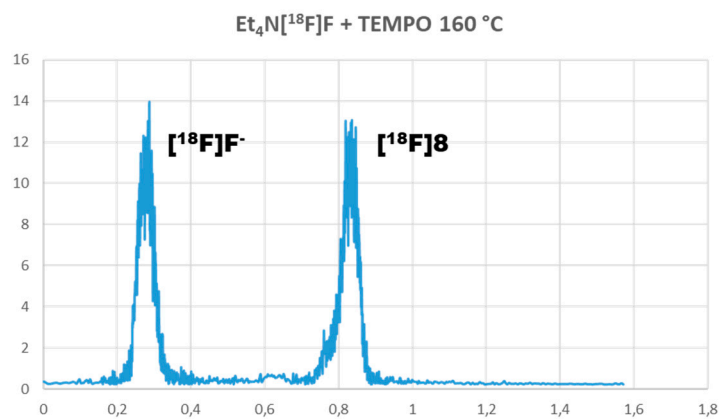

**Figure S12.** TLC of the crude radiofluorination of **7** using Et<sub>4</sub>N[<sup>18</sup>F]F and TEMPO (1 mg) in DMF at 160 °C for 10 minutes.
